# Supplementary material for: A long chain-induced depletion effect for abnormal grafting in the preparation of bimodal bidisperse polymer-grafted nanoparticles
Source: Royal Society of Chemistry journal article supplement (doi:10.1039/d2cp04229k), 2023-01-01
Supplement: d2cp04229k1.pdf [file d2cp04229k1.pdf]

## Supporting Information

### **Long chain–induced depletion effect for abnormal grafting in the preparation of bimodal bidisperse polymer-grafted nanoparticle**

Chu-Xiang Li,<sup>a†</sup> Jin-Yuan Mao,<sup>c, d†</sup> Shu-Jia Li<sup>b</sup>, Yan Wang<sup>\*b</sup> and Hong Liu<sup>\*b</sup>

<sup>a</sup>*Key Laboratory of Theoretical Chemistry of Environment Ministry of Education, School of Chemistry, South China Normal University, Guangzhou, Guangdong 510006, People's Republic of China.*

<sup>b</sup>*Key Laboratory of Theoretical Chemistry of Environment Ministry of Education, School of Environment, South China Normal University, Guangzhou, Guangdong 510006, People's Republic of China*

*Email: [wangyan.cn@m.scnu.edu.cn](mailto:wangyan.cn@m.scnu.edu.cn) (Y. Wang)*

*[hongliu@m.scnu.edu.cn](mailto:hongliu@m.scnu.edu.cn) (H. Liu)*

<sup>c</sup>*South China Advanced Institute for Soft Matter Science and Technology, School of Molecular Science and Engineering, South China University of Technology, Guangzhou 510640, China.*

<sup>d</sup>*South China Advanced Institute for Soft Matter Science and Technology, School of Molecular Science and Engineering, South China University of Technology, Guangzhou 510640, China.*

<sup>†</sup> Chu-Xiang Li and Jin-Yuan Mao contributed equally to this work.

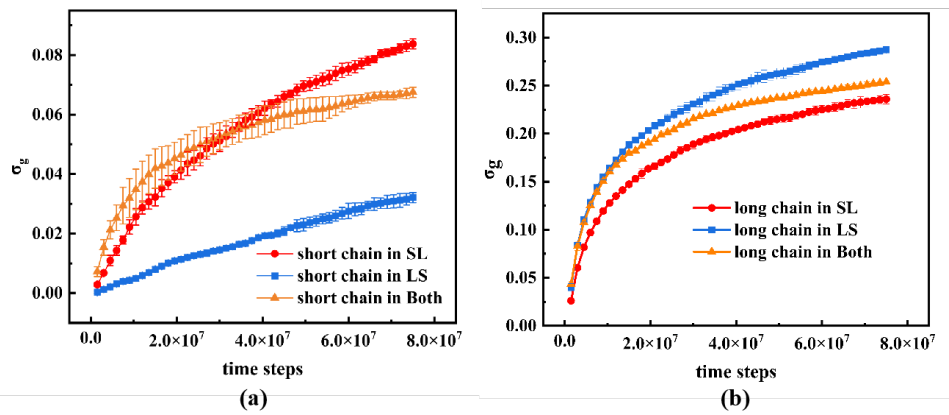

**Figure.S1.** Variation of the average graft density  $\sigma_g$  of short chains (a) and long chains (b) of different grafting strategies (red lines for SL, orange lines for Both and blue lines for LS) with MD simulation time in the case of  $\lambda = 0.125$ . Three sets of parallel samples are used to calculate the average value and error bar.

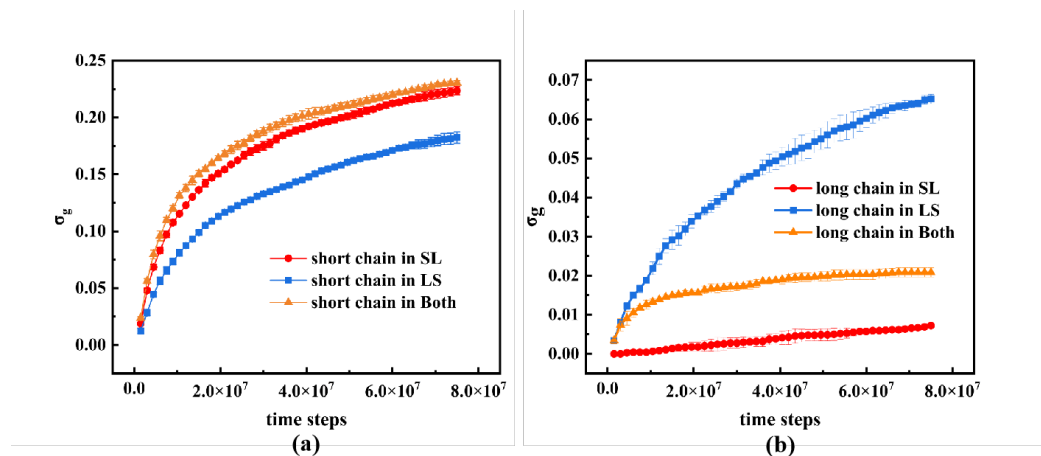

**Figure S2.** Variation of the average graft density  $\sigma_g$  of short chains (a) and long chains (b) of different grafting strategies (red lines for SL, orange lines for Both and blue lines for LS) with MD simulation time in the case of  $\lambda = 0.875$ . Three sets of parallel samples are used to calculate the average value and error bar.
